1 **Retrospective serological analysis reveals presence of the emerging lagovirus RHDV2 in Australian**  
2 **wild rabbits at least six months prior to its first detection.**

3 Running title: Serological evidence for earlier RHDV2 arrival in Australia

4 Tanja Strive\*<sup>1,2</sup>, Melissa Piper<sup>1</sup>, Nina Huang<sup>1,2</sup>, Roslyn Mourant<sup>1</sup>, John Kovaliski<sup>3</sup>, Lorenzo Capucci<sup>4</sup>,  
5 Tarnya E Cox<sup>2,5</sup> and Ina Smith<sup>1</sup>.

6 <sup>1</sup>Commonwealth Scientific and Industrial Research Organisation, Black Mountain, Canberra, Australia

7 <sup>2</sup>Centre for Invasive Species Solutions, University of Canberra, Bruce, Australia

8 <sup>3</sup>Biosecurity SA, Department of Primary Industries and Regions, Adelaide, Australia

9 <sup>4</sup>Istituto Zooprofilattico Sperimentale della Lombardia e dell'Emilia Romagna 'Bruno Ubertini'  
10 (IZSLER), OIE Reference Laboratory for Rabbit Haemorrhagic Disease, Brescia, Italy

11 <sup>5</sup>Vertebrate Pest Research Unit, New South Wales Department of Primary Industries, Orange,  
12 Australia

13

14 \*Author for correspondence: [Tanja.strive@csiro.au](mailto:Tanja.strive@csiro.au)

15

16 **Summary:**

17 The lagovirus Rabbit Haemorrhagic Disease Virus (RHDV) has been circulating in Australia since the  
18 mid-1990s when it was deliberately released to control overabundant rabbit populations. In recent  
19 years, the viral diversity of different RHDVs in Australia has increased, and currently four different  
20 types of RHDV are known to be circulating. To allow for ongoing epidemiological studies and impact  
21 assessments of these viruses on Australian wild rabbit populations, it is essential that serological  
22 tools are updated. To this end, Reference sera were produced against all four virulent RHDVs

23 (including RHDV2) known to be present in Australia and tested in a series of available immunological  
24 assays originally developed for the prototype RHDV, to assess patterns of cross reactivity and the  
25 usefulness of these assays to detect lagovirus antibodies, either in a generic or specific manner.  
26 Enzyme Linked Immuno Sorbent Assays (ELISAs) developed to detect antibody isotypes IgM, IgA and  
27 IgG were sufficiently cross reactive to detect antibodies raised against all four virulent lagoviruses.  
28 For the more specific detection of antibodies to the antigenically more different RHDV2, a  
29 competition ELISA was adapted using RHDV2 specific monoclonal antibodies in combination with  
30 Australian viral antigen. Archival serum banks from a long term rabbit monitoring site where rabbits  
31 were sampled quarterly over a period of six years were re-screened using this assay, and revealed  
32 serological evidence for the arrival of RHDV2 in this population at least six months prior to its initial  
33 detection in Australia in a deceased rabbit in May 2015. The serological methods and reference  
34 reagents described here will provide valuable tools to study presence, prevalence and impact of  
35 RHDV2 on Australian rabbit populations; however the discrimination of different antigenic variants  
36 of RHDVs as well as mixed infections at the serological level remains challenging.

37 **Keywords:**

38 Differential diagnostic, serology, RHDV, RHDVa, RHDV2, epidemiology, ELISA, biological control

39

40

41 **Introduction:**

42 Rabbit Haemorrhagic Disease Virus (RHDV, sometimes also referred to as RHDV1 or GI.1c, according  
43 to a new proposed nomenclature (Le Pendu et al., 2017)), belongs to the genus lagovirus within the  
44 family *caliciviridae*. RHDV was released in Australia as a biological control agent for introduced wild  
45 rabbits, a devastating agricultural and environmental pest species in this country (Cooke and Fenner,  
46 2002). While initially very effective in reducing rabbit populations across large parts of the continent

47 (Saunders et al., 2002, Mutze et al., 1998), RHDV was not effective in the more temperate areas of  
48 South Eastern Australia. This lack of effectiveness was likely due to the presence of endemic, non-  
49 pathogenic caliciviruses (Rabbit calicivirus Australia 1, also termed RCV-A1, or GI.4) that can provide  
50 transient and partial immunological cross protection to RHDV (Strive et al., 2013, Liu et al., 2014),  
51 thereby reducing both case fatality and infection rates (Cooke et al., 2018). In addition to the  
52 impeding effects of RCV-A1, rabbit populations have been recovering in recent years (Mutze et al.,  
53 2014), and developing genetic resistance to RHDV has been reported in some Australian rabbit  
54 populations (Elsworth et al., 2012, Nystroem et al., 2011). In an attempt to 'boost' rabbit biocontrol  
55 in Australia and to maintain the substantial economic and environmental gains made by the long  
56 term suppression of rabbit populations by RHDV (Pedler et al., 2016, Cooke, 2013), an additional  
57 strain of RHDV was released nationwide in Australia in March 2017 (Hall et al., 2018, Strive and Cox,  
58 2019). This strain termed RHDVa-K5 is a naturally occurring antigenic variant of RHDV from Korea  
59 (Oem et al., 2009) which was shown experimentally to be more effective in infecting rabbits from a  
60 genetically resistant rabbit population (Elsworth et al., 2012) and in overcoming partial protection  
61 conveyed by the benign RCV-A1 (Cox et al., 2013). These antigenic variants of RHDV, referred to as  
62 RHDVa (GI.1a, or RHDV1a), were first reported in the late 1990s (Capucci et al., 1998), and although  
63 they exhibit antigenic differences they are considered to be of the same serotype (Lavazza and  
64 Capucci, 2016).

65 Prior to the release of RHDVa-K5, the incursions of two additional RHDV variants were reported in  
66 Australia. The first incursion was another variant RHDVa (GI.1a) strain in the greater Sydney area  
67 that most closely resembled a Chinese isolate (Wang et al., 2012) that appeared in early 2014. This  
68 virus, termed RHDVa-Aus, caused a number of recorded outbreaks mostly in domestic rabbit farms,  
69 however, its distribution appeared geographically limited to the east and north east of New South  
70 Wales (Mahar et al., 2018b). In May 2015, the incursion of a second exotic virus, the recently  
71 emerged RHDV2 (GI.2) was reported in Australia (Hall et al., 2015). RHDV2 is a new lagovirus that  
72 was first reported in Europe in 2010 (Le Gall-Recule et al., 2011, Dalton et al., 2012). It is not only

73 genetically distinct from RHDV and RHDVa but, unlike RHDV and RHDVa, is also able to cause highly  
74 fatal disease in very young rabbits (Neimanis et al., 2018a, Dalton et al., 2014) and capable of fatally  
75 infecting several species of hares, making it the only known lagovirus that does not exhibit strict  
76 species specificity (Camarda et al., 2014, Hall et al., 2017, Le Gall-Recule et al., 2017, Neimanis et al.,  
77 2018b, Puggioni et al., 2013, Velarde et al., 2017). Since its arrival in Australia, RHDV2 has become  
78 the dominant strain circulating in the field, seemingly replacing older RHDV1 strains and accounting  
79 for the majority of reported cases in wild and domestic rabbits (Mahar et al., 2018a).

80 With the increasing diversity of co-circulating RHDVs both in Australia and Europe it was essential to  
81 update the diagnostic tools available, to allow for specific identification of strains and to measure  
82 the impact they were having on wild rabbit (and hare) populations. Due to the genetic variability, the  
83 development of specific molecular diagnostics was comparably straightforward, and accordingly  
84 several tailored approaches have been described in both Europe and Australia (Carvalho et al., 2017,  
85 Duarte et al., 2015, Hall et al., 2018, Le Gall-Recule et al., 2017). In contrast, the development of  
86 specific serological tools is more challenging. Although strain specific epitopes have been described  
87 for lagoviruses and specific monoclonal antibodies have been developed (Capucci et al., 1996a,  
88 Capucci et al., 1998, Capucci et al., 1995, Dalton et al., 2018, Kong et al., 2016, Liu et al., 2012b),  
89 discriminatory serology remains difficult, in particular for closely related RHDVs, due to the large  
90 number of shared epitopes (Lavazza and Capucci, 2016). The infection history of populations can  
91 often only be inferred based on reactivity patterns (Barcena et al., 2015, Velarde et al., 2016).

92 In Australia, the development of specific serological tools to discriminate between different  
93 lagoviruses was of particular importance. Here, RHDV2 was actively circulating at the time the new  
94 strain RHDVa-K5 was released nationwide (Strive and Cox, 2019) and specific serological tools were  
95 needed to investigate the respective impacts and potential interactions the two strains had on wild  
96 Australian rabbits at a population level. Furthermore, in the years leading up to the national release  
97 of RHDVa-K5, extensive serological monitoring of several Australian rabbit populations was carried

98 out. Screening these sample banks with a serological assay specific to RHDV2 might allow a more  
99 accurate determination of the exact time point this virus entered into Australia and started to  
100 circulate in wild rabbit populations before it was detected in May 2015 (Hall et al., 2015).

101 This study describes the production of reference sera raised against all virulent RHDV strains known  
102 to be circulating in Australia for the purpose of assessing the cross-reactivity patterns in a panel of  
103 existing serological assays used to infer disease dynamics of RHDV in rabbit populations. It further  
104 describes the adaptation of a European RHDV2 cELISA to the Australian strain of RHDV2, and the  
105 modification of IgM and IgA isotype ELISAs for the improved detection of RHDV2 antibodies. The  
106 RHDV2 cELISA was then applied to retrospectively analyse a long term field monitoring site to  
107 estimate the time of arrival on RHDV2 at this site.

108

## 109 **Material and methods:**

### 110 *Ethics approval:*

111 All work involving animals was approved by the CSIRO Ecosystem Sciences Animal Ethics Committee  
112 (ESAEC #10-13, #11-01, #13-01, #13-10, #DOMRAB) and the Orange Animal Ethics Committee  
113 (ORA11/14/001, ORA14/17/001) and carried out in accordance with the Australian code for the care  
114 and use of animals for scientific purposes.

### 115 *Production of antigen, virus inoculum and experimental vaccine*

116 Two five week old New Zealand white rabbits were infected with 0.5 ml of a 2% clarified liver  
117 homogenate of the first RHDV2 field isolate found in Australia (BIMt-1, Gen Bank# KT280060) (Hall et  
118 al., 2015). Rabbits were monitored twice daily for signs of terminal rabbit haemorrhagic disease  
119 (RHD), which was defined as 10% weight loss within a 24 hour period, no resistance to handling or  
120 lateral recumbency, or hypothermia following a fever episode, often in combination with lethargy.  
121 Both rabbits experienced a peracute form of RHD, one was found displaying signs of terminal RHD at

122 66 hours post infection (h.p.i.) and was euthanized, the second was found dead 90 h.p.i. with no  
123 prior signs of terminal RHD detected.

124 The liver of one of the RHDV2 infected rabbits was used for the production of an experimental  
125 vaccine, according to methods published previously (Lavazza and Capucci, 2016). Briefly, a 20% w/v  
126 liver homogenate (containing approximately  $3 \times 10^8$  capsid gene copies/ml) was prepared in sterile  
127 PBS and clarified by centrifugation for 20 min at 2,000 g. Chloroform was added to the supernatant  
128 to a final concentration of 2% (v/v) and incubated at 4°C overnight, followed by a second clarification  
129 at 10,000g and 4°C. Part of the clarified supernatant was removed, mixed 1:1 with glycerol and  
130 stored at -80°C as RHDV2 inoculum for subsequent infections (0.5 ml/rabbit). Formalin was added to  
131 the remaining supernatant to a final concentration of 0.8% v/v and incubated at room temperature  
132 overnight. A second inactivation step was performed by adding formalin to a total concentration of  
133 1% v/v with overnight incubation at 4°C. This preparation was stored at 4°C until used. Immediately  
134 prior to use, the vaccine was brought to room temperature, mixed 1:1 with Addavax (Invivogen, San  
135 Diego, USA), and between 0.6 and 1.2 ml were injected subcutaneously in the scruff of the neck.

136 For the production of RHDV2 ELISA antigen, a 10% w/v homogenate of the liver of the second rabbit  
137 was clarified using two centrifugation steps (20 min at 3000g, followed by 30 min at 6000g, at 4°C),  
138 and then passed through a 0.8 µm filter. The resulting homogenate was mixed 1:1 with glycerol and  
139 stored at -80°C.

140 A commercially produced preparation of RHDVa-K5 was used as inoculum to produce hyperimmune  
141 sera, diluted to 10,000 RID<sub>50</sub>/ml (Elizabeth Macarthur Agricultural Institute, Menangle, Australia).

142 RHDVa-Aus inoculum was prepared from a 2% of clarified liver homogenate of RHDVa-Aus (Ber-3,  
143 GenBank # KY628310) (Mahar et al., 2018b). The infectious dose of the RHDVa-Aus and the RHDV2  
144 inoculum was not titrated.

145 *Production of reference sera*

146 For the production of RHDVa hyperimmune sera, five-week old rabbits were infected with RHDVa-  
147 Aus (n=4) and RHDVa-K5 (n=5). Due to the age related innate resistance to lethal RHDV infection  
148 (Matthaei et al., 2014, Neave et al., 2018) it was expected that rabbits of this age group would not  
149 succumb to fatal RHDV infection, but survive and mount a strong antibody response. Rabbits were  
150 orally infected with 0.5 ml of virus inoculum using a 1 ml syringe. Rabbits were monitored twice daily  
151 for the first four days and then daily afterwards. A small (0.1-0.2 ml) blood sample was collected  
152 from the marginal ear vein at day 0, 7 and 14. Two rabbits in each group were sacrificed and bled at  
153 14 dpi the remaining rabbits at 20 dpi (RHDVa-K5) and 22 dpi (RHDVa-Aus) (Table 1).

154 Archival serum samples from five rabbits collected at various time points were used as RHDV  
155 hyperimmune reference sera. In this previous study (T. Strive, unpublished), three 5 week old New  
156 Zealand white rabbits were infected orally with 500 ID<sub>50</sub> of a commercial RHDV preparation (RHDV  
157 v351, Elizabeth Macarthur Agricultural Institute, Menangle, Australia), blood samples were collected  
158 at 7 dpi and a final bleed was carried out at 14 dpi. Hyperimmune RHDV sera from an additional four  
159 rabbits harvested at various time points were available from a previous study (Matthaei et al., 2014).  
160 Seven RCV-A1 polyclonal sera were also included (Liu et al., 2012b), as well as an additional seven  
161 negative control sera.

162 For the production of RHDV2 polyclonal sera, rabbits needed to be partially vaccinated prior to the  
163 challenge, as young rabbits are not innately resistant to lethal RHDV2 infection (Neimanis et al.,  
164 2018a). Three five-week old rabbits and two adult rabbits of approximately three years of age were  
165 injected with the experimental vaccine preparation as described above. One adult animal was  
166 challenged 10 days after vaccination (dpv) the remaining four rabbits in this group were challenged  
167 six dpv. Monitoring and blood sampling of these animals was carried out as for the RHDVa infected  
168 rabbits (Table 1).

169 *RHDV2 specific monoclonal antibody*

170 A mouse monoclonal antibody (Mab) conjugated to horse radish peroxidase (4H12-HRP, lot 150416)  
171 and raised against a European strain of RHDV2 was purchased from the Istituto Zooprofilattico  
172 Sperimentale (IZS, Brescia, Italy).

### 173 *ELISA*

174 The RHDV IgM, IgA and IgG isotype ELISA (Liu et al., 2012b), the RHDV competition ELISA (cELISA)  
175 (Cooke, 2002) and the RCV-A1 blocking ELISA (bELISA) (Liu et al., 2012a) were performed as  
176 described previously.

177 The RHDV2 cELISA workflow and volumes used were similar to the RHDV cELISA, with modifications.  
178 Plates were coated overnight at 4°C with a polyclonal RHDV2 rabbit serum (A#Jul, 17 dpi) at a 1:2000  
179 dilution in carbonate buffer (pH 9.6). The plates were washed with PBS –Tween (PBS-T) prior to the  
180 addition of serial dilutions of rabbit sera starting at 1:40 dilution followed immediately with the  
181 addition of RHDV2 crude antigen at a 1:20 dilution and incubated at 37°C for 1 hour. The plate was  
182 washed and the MAb 4H12-HRP at a 1:300 dilution (0.8 µg/ml) was added and incubated at 37°C for  
183 1 hr. The plate was washed and OPD substrate was added and incubated for 5 minutes before being  
184 stopped by the addition of 1M sulphuric acid. The plate was read at 492nm. Optimal concentrations  
185 of antigen and MAb were determined by checkerboard titrations using rabbit sera known to be  
186 positive and negative to RHDV2. Concentrations were selected that resulted in an optical density  
187 (OD) of between 1 and 1.2 for a panel of 15 negative reference sera as well as the highest signal to  
188 noise ratio when compared to the positive control serum. A serum was scored positive when the OD  
189 was reduced to 75% or less compared to the OD of the negative reference serum at the same  
190 dilution.

191 The IgM and IgA ELISAs were adapted to RHDV2 to assess if the sensitivity of detection of these  
192 immunoglobulins can be increased. The general set up of the assays was similar to that reported for  
193 RHDV IgM and IgA isotype ELISAs (Liu et al., 2012b), except for substituting RHDV virus like particles



194 with crude RHDV2 virus antigen at a 1:20 dilution, and using MAb 4H12-HRP as the detecting  
195 antibody at a 1:300 dilution (0.8 µg/ml).

#### 196 *RHDV2 cELISA analysis of field samples collected before and after RHDV2 arrival*

197 A long term field site located in the central tablelands of New South Wales (Oakey Creek,  
198 33°24'40''S, 149°22'1''E) was visited quarterly to collect serum samples from between ten and 25  
199 healthy shot rabbits (average n=19.3), between January 2012 and January 2018. Rabbit shooting and  
200 sample collection was carried out as described previously (Cox et al., 2017), rabbit age was  
201 estimated based on dry eye lens weight as previously reported (Augusteyn, 2007). Since January  
202 2012, samples collected for this site had been analysed using a suite of ELISAs originally developed  
203 for RHDV (Cooke, 2002).

204

#### 205 **Results:**

##### 206 *Serum production*

207 None of the five week old rabbits infected with RHDVa-Aus or RHDVa-K5 developed severe clinical  
208 signs or succumbed to RHD. A short fever episode of  $\geq 40^{\circ}\text{C}$  was observed in all four kittens infected  
209 with RHDVa-Aus and three out of four kittens infected with RHDVa-K5 between 2 and 4 dpi. These  
210 fever episodes were not associated with any changes in behavior and all animals continued to gain  
211 weight throughout the experiment.

212 In the group of rabbits used to produce RHDV2 polyclonal serum, no adverse reaction to the  
213 experimental vaccine was observed in any of the animals at the injection sites. No behavioral  
214 abnormalities or elevated temperatures were recorded in any of the rabbits in this group following  
215 vaccination and subsequent challenge with RHDV2.

##### 216 *Cross-reactivity of reference sera in RHDV isotype ELISAs*

217 Isotype ELISAs, in particular IgM and IgA are important tools to infer disease lagovirus dynamics in  
218 rabbit populations, with IgM indicative of a recent outbreak and a boost in IgA indicating re-  
219 exposure of previously infected individuals. High levels of cross-reactivity in the RHDV IgM, IgA and  
220 IgG isotype ELISAs were observed in sera raised against RHDVa-Aus and RHDVa-K5 compared to the  
221 RHDV-Czech polyclonal sera (Table 1). Sera raised against RHDV2 also showed varying levels of cross-  
222 reactivity in this assay, but with different patterns. Cross-reactivity was highest in the IgG ELISA, with  
223 detectable titres in all animals at 8 dpi, and in one case day 6 post vaccination and prior to RHDV2  
224 challenge. IgM antibodies were detected in all RHDV2 polyclonal reference sera although titres were  
225 lower compared to those of the RHDVa-K5, RHDV-Aus and RHDV-Czech reference sera collected at  
226 similar time points post infection. IgA antibodies are indicative of active replication of RHDV  
227 following a natural infection and are not seen in rabbits treated with inactivated vaccines (Lavazza  
228 and Capucci, 2016) and accordingly, no IgA responses were observed in this group following  
229 vaccination. IgA cross-reactivity in the RHDV2 polyclonal sera was present but with overall lower  
230 titres and with a later onset compared to rabbits infected with RHDV and RHDVa strains, indicating  
231 an active but possibly attenuated infection with RHDV2 in these previously vaccinated animals (Table  
232 1). Overall, the IgM and IgA isotype ELISAs originally developed for RHDV appear suitable to detect  
233 disease activity of all circulating virulent strains in wild rabbit populations, although the sensitivity of  
234 detection may be slightly reduced.

#### 235 *Increased sensitivity and specificity in the RHDV2 adapted IgA and IgM ELISAs*

236 When the isotype ELISAs for IgA and IgM were adapted to RHDV2 specific reagents, the titres of the  
237 RHDV2 reference sera were at least four fold greater when compared to the respective original  
238 RHDV isotype assays, and where sufficient amounts of serum were available for testing, both IgM  
239 and IgA antibodies were detected earlier (Table 1). RHDV-Czech, RHDVa-K5, and RHDVa-Aus  
240 reference sera also cross-reacted in the RHDV2 IgM and IgA ELISA, but had lower titres compared to

241 the RHDV2 reference sera (Table 1). Due to the high level of cross reactivity of RHDV2 polyclonal  
242 sera in the in the IgG assay, the IgG isotype ELISA was not adapted.

243 *Cross-reactivity of reference sera in specific competition or blocking ELISAs for RCV-A1, RHDV and*  
244 *RHDV2*

245 The RHDV2 cELISA developed here from Australian and European reagents proved to be highly  
246 sensitive and specific. Low levels of reactivity were detected as early as 6 dpv with titres increasing  
247 until the end of the trial (Table 1). Sera raised against RHDV-Czech, RHDVa-Aus and RHDVa-K5 only  
248 showed low levels of cross-reactivity in this assay, only in one case exceeding titres of 1:40 (1:160,  
249 K#315, 22 dpi, Table 1). None of the seven archival RCV-A1 control sera reacted in the RHDV2 cELISA.

250 In contrast, the RHDV cELISA showed low to moderate levels of cross-reactivity with RHDV2  
251 polyclonal sera, and very high levels of cross-reactivity with the sera raised against the two RHDVa  
252 strains (Table 1). Only one of the RHDV-Czech reference sera tested here showed a very low level of  
253 cross-reactivity with the RCV-A1 bELISA (1:10, K#177, 14 dpi, Table 1). Only sera from the terminal  
254 bleeds were tested in the RHDV cELISA and RCV-A1 bELISA as there was not sufficient serum left  
255 from the previous sampling points.

256 *The ratio of the two specific cELISAs for RHDV and RHDV2 can be used to infer the presence of RHDV2*  
257 *specific antibodies*

258 We explored if the ratios between the RHDV and RHDV2 cELISAs could be used to infer the presence  
259 of RHDV2 antibodies in the populations, similar to an approach used previously to discriminate  
260 between RHDV2 and European Brown Hare Syndrome Virus (EBHSV) antibodies in wild hare  
261 populations in Europe (Velarde et al., 2017). While there was some level of cross-reactivity between  
262 the respective cELISAs in the reference sera produced for this study, the titres were always higher  
263 for the respective specific viral antigen. To investigate this further, negative results were set to a  
264 titre of 1:5 for the purpose of forming ratios between reciprocal titres, and only samples were

265 included in the analysis that had returned a positive reaction in either of the two assays, as  
266 described previously (Velarde et al., 2017). Due to the high likelihood of cross reactivity at very low  
267 dilutions, only test results  $> 1:40$  were considered for this analysis. The RHDV2 cELISA/RHDV cELISA  
268 titre ratios were  $>1$  in all reference sera raised against RHDV2, with ratios ranging from 1 to 100. In  
269 all reference sera raised against RHDV or RHDVa the ratios were  $<1$ , ranging from 0.008 to 0.125 for  
270 sera raised against RHDVa-K5 and RHDVa-Aus, and from 0.0002 to 0.0156 for sera raised against  
271 RHDV-Czech.

272 We then applied this method to retrospectively test archival serum samples collected at the Oakey  
273 Creek long term study site where these were available. Here, approximately 20 rabbits had been  
274 sampled quarterly since January 2012 and analysed with the serological assays originally developed  
275 for RHDV (Cooke et al., 2000). RHDV IgM and IgA assays were only carried out at a 1:40 dilution to  
276 detect presence or absence of recent disease activity but were not titrated. These samples were re-  
277 tested in the RHDV2 cELISA described here to determine the time of RHDV2 arrival at this site.

278 Initially we analysed a very early sample of  $n=20$  rabbits from autumn 2012 as a negative baseline, as  
279 it was considered very unlikely that RHDV2 would have been present in Australia over three years  
280 prior to its detection. We then continued the analysis starting with the most recent samples,  
281 working backwards until four consecutive samples showed no serological evidence of RHDV2.

282 Unexpectedly, serological analysis revealed clear evidence for presence of RHDV2 antibodies in this  
283 population with several samples resulting in an RHDV2cELISA/RHDVcELISA ratio of  $>1$  as early as  
284 January 2015 (Figure 1). This indicates that RHDV2 must have arrived at this site sometime between  
285 the sampling periods October 2014 and January 2015, which pre-dates the first case report of  
286 RHDV2 in a deceased rabbit by at least six months (Hall et al., 2015). While fluctuating, overall  
287 seroprevalence to RHDV2 increased in later sampling periods coinciding with an overall decrease of  
288 animals classified as positive to RHDV.

289 Some level of cross reactivity was observed in the RHDV2 cELISA prior to RHDV2 arrival. Four out of  
290 96 samples analysed that were collected prior to January 2015 showed low level cross reactivity in  
291 the RHDV2 cELISA with titres between 1:40 and 1:80. However in all these cases the individual  
292 rabbits had higher titres in the RHDV cELISA resulting in a ratio of <1 in all cases.

293 IgM antibodies indicative of recent lagovirus outbreaks were frequently detected in this population  
294 prior to the arrival of RHDV2, namely in winter and spring 2012, summer 2014, and winter and  
295 spring 2014. No evidence for recent virus activity was detected in the following five sampling  
296 periods, but then again in autumn and spring 2016, and again in autumn 2017 (Figure 1). In order to  
297 ascertain which virus was likely causing these outbreaks, we investigated the antibody profiles in the  
298 recent cohorts of rabbits (Figure 2). Although some rabbit breeding in this part of Australia is  
299 possible year round, the main breeding events occur in winter/spring. Accordingly, members of each  
300 new cohort of rabbits starts to appear in the summer shot sample, and subsequent sampling periods  
301 throughout the year reflect the increase in age of this cohort (Figure 2). As expected, all animals  
302 scored as positive to RHDV with a cELISA ratio <1 prior to January 2015. After the arrival of RHDV2 at  
303 this site, in start to appear in the January 2015 sample. However, evidence for RHDV positive animals  
304 in less than 12 months of age was found in January 2017 and October 2017. These animals had not  
305 yet been born at the time of RHDV2 arrival, indicating that both RHDV and RHDV2 must have been  
306 involved in the three periods of virus activity recorded since RHDV2 arrival at this site. The RHDV  
307 cELISA titres in these young rabbits were high, ranging from 1:80 to 1:2560 (1:840 avg), indicating a  
308 strong immune response from an active RHDV infection rather than the presence of residual  
309 maternal antibodies.

### 310 **Discussion:**

311 Specific serology of different lagoviruses can be challenging, as high levels of cross-reactivity are  
312 often observed even between antigenically very different members of this genus (Capucci et al.,  
313 1996b, Liu et al., 2012b, Nagesha et al., 2000). For the more specific detection of different viruses,

314 less sensitive and more specific cELISAs or bELISAs have been described (Capucci et al., 1991, Collins  
315 et al., 1995, Liu et al., 2012a), however, isotype ELISAs detecting IgG antibodies are so cross-reactive  
316 that they have historically been used to infer the presence of previously unknown and often  
317 antigenically quite different lagoviruses (Capucci et al., 1996b, Cooke et al., 2000, Nagesha et al.,  
318 2000, Robinson et al., 2002).

319 These difficulties notwithstanding, there is a need for improved serological tools to discriminate  
320 between antibodies to the different lagoviruses circulating in Australia, to better understand their  
321 role in naturally occurring disease dynamics as well as biological control operations of wild rabbits.  
322 For over two decades only RHDV and RCV-A1 were known to be present in Australia, and their  
323 disease dynamics have been studied extensively, utilising specific cELISAs or bELISAs for RHDV and  
324 RCV-A1 as well as isotype ELISAs for both viruses (Cooke et al., 2000, Liu et al., 2012a, Liu et al.,  
325 2012b). The recent arrival of two different strains of RHDVa (RHDVa-Aus and RHDVa-K5) as well as  
326 RHDV2 has highlighted the need to update and extend the panel of serological tools available on this  
327 continent to enable better studies of the epidemiology and interactions of these viruses.

328 Disease dynamics of RHDV can be inferred by interpreting the reaction profiles in different isotype  
329 and cELISAs (Cooke, 2002). In this approach, IgM is interpreted as an indicator of a recent outbreak  
330 and first time exposure of an individual to RHDV, a boost in IgA titres as a measure for re-exposure  
331 to RHDV, and the highly sensitive but cross-reactive IgG is used to infer the presence of maternal  
332 antibodies in very young rabbits. In our study, the reference sera raised against RHDV-Czech, RHDVa-  
333 Aus, RHDVa-K5 and RHDV2 all reacted to varying degrees in these assays, indicating that they should  
334 be suitable to detect broad patterns of disease activity caused by any of the virulent lagovirus strains  
335 in wild rabbit populations in Australia, however they do not allow for the discrimination between the  
336 various strains.

337 Adaptation of the IgM and IgA ELISA to RHDV2 by using RHDV2-specific antigen and Mab increased  
338 the sensitivity of these assays for RHDV2 IgM and IgA detection substantially. While the use of the

339 original RHDV IgA and IgM assays is sufficient to infer broader disease activity patterns in wild rabbit  
340 populations for all lagoviruses including RHDV2 (Figure 1), switching to these more sensitive assays  
341 for future large scale field epidemiology studies should be considered if RHDV2 remains the  
342 dominant strain in the Australian landscape (Mahar et al., 2018a).

343 The RHDV2 cELISA described here proved to be highly specific for the detection of RHDV2  
344 antibodies, with low levels of cross-reactivity to the experimentally produced RHDV and RHDVa  
345 reference sera as well as the sera from wild rabbits collected before the arrival of RHDV2 in  
346 Australia. In contrast, the existing RHDV cELISA (Capucci et al., 1991) showed low to medium levels  
347 of cross-reactivity to RHDV2 and high levels of cross-reactivity to both RHDVa-Aus and RHDVa-K5.  
348 However, in the RHDV and RHDV2 cELISAs, titres were higher in the sera raised against the  
349 respective strain, such that the ratios of the reciprocal titres of the two assays can be used to infer  
350 which strain the rabbit was most likely exposed to. It needs to be noted that this method classifies  
351 rabbits into positive to either RHDV or RHDV2, and therefore does not allow for the detection of  
352 mixed infections and the true prevalence to both RHDV and RHDV2 is likely underestimated.  
353 However the method does allow to detect presence of RHDV2 and should allow to discern broader  
354 trends within rabbit populations.

355 When applied to a sample collection from a long term field monitoring site, this method showed  
356 clear evidence for RHDV2 activity in this population at least six months prior to the first RHDV2 case  
357 reported in Australia (Hall et al., 2015), and confirms inferences made from phylogenetic analyses of  
358 viral sequences suggesting that RHDV2 had circulated in Australia several months prior to its first  
359 detection in May 2015 (Mahar et al., 2018a).

360 The inclusion of age data into the analysis allowed the confirmation of RHDV activity in this  
361 population after July 2016. In addition, including age data into the analysis may provide a more  
362 accurate estimate of disease dynamics than analysing overall seroprevalence data alone. A large  
363 proportion of rabbits present in every shot sample were >500 days old, and may therefore confound

364 the analysis of recent virus activity. In addition, if some level of immunological cross protection  
365 exists between RHDV and RHDV2 (Calvete et al., 2018), the removal of susceptible rabbits by an  
366 RHDV2 outbreak from the population could result in an apparent increase of RHDV seroprevalence,  
367 due to the resulting increased proportion of surviving old RHDV seropositive animals in the sample.

368 **Conclusions:**

369 The analysis of the reference sera as well as field sera collected pre- and post-RHDV2 arrival in  
370 Australia indicates that existing RHDV IgA and IgM isotype ELISAs are suitable to infer disease  
371 dynamics of all virulent RHDV strains currently circulating in Australia. The ratio between the RHDV2  
372 and RHDV cELISA titres allows for the detection of the presence of RHDV2 specific antibodies with  
373 high levels of certainty, even in the presence of RHDV or RHDVa antibodies. In combination, the  
374 methods described here should allow for retrospective analysis of archival field sera to study the  
375 spread and impact of RHDV2 on Australian rabbit populations as well as allow for a more accurate  
376 estimate of the time of RHDV2 arrival at various site in Australia. Including rabbit age data, where  
377 available, will improve these analyses. However, due to the high levels of cross-reactivity of RHDV2  
378 reference sera in the RHDV cELISA, detecting RHDV or RHDVa antibodies in samples collected post  
379 RHDV2 arrival is challenging. In particular, inferring mixed infections of RHDV/RHDVa/RHDV2 or  
380 confirming the absence of RHDV antibodies in RHDV2 positive populations is difficult to discern.  
381 Similarly, distinguishing between antibodies to RHDV and RHDVa strains is not feasible with the  
382 serological tools currently available. Despite these remaining challenges in the differential  
383 serodiagnostics of Australian lagoviruses, the additional assays described here represent an  
384 important addition to the tool kit that will benefit ongoing continent-wide lagovirus epidemiology  
385 studies.

386 **Competing interests:** The authors declare that they have no competing interests.

387 **Acknowledgements:** We thank Peter Kerr and Robyn Hall for helpful comments on the manuscript.



388 **References:**

- 389 Augusteyn, R. C., 2007: On the relationship between rabbit age and lens dry weight: improved  
390 determination of the age of rabbits in the wild. *Mol Vis*, 13, 2030-2034.
- 391 Barcena, J., B. Guerra, I. Angulo, J. Gonzalez, F. Valcarcel, C. P. Mata, J. R. Caston, E. Blanco and A.  
392 Alejo, 2015: Comparative analysis of rabbit hemorrhagic disease virus (RHDV) and new  
393 RHDV2 virus antigenicity, using specific virus-like particles. *Veterinary research*, 46, 106.
- 394 Calvete, C., M. Mendoza, A. Alcaraz, M. P. Sarto, M. P. Jimenez-de-Baguess, A. J. Calvo, F. Monroy  
395 and J. H. Calvo, 2018: Rabbit haemorrhagic disease: Cross-protection and comparative  
396 pathogenicity of GI.2/RHDV2/b and GI.1b/RHDV lagoviruses in a challenge trial. *Vet*  
397 *Microbiol*, 219, 87-95.
- 398 Camarda, A., N. Pugliese, P. Cavadini, E. Circella, L. Capucci, A. Caroli, M. Legretto, E. Mallia and A.  
399 Lavazza, 2014: Detection of the new emerging rabbit haemorrhagic disease type 2 virus  
400 (RHDV2) in Sicily from rabbit (*Oryctolagus cuniculus*) and Italian hare (*Lepus corsicanus*).  
401 *Research in Veterinary Science*, 97, 642-645.
- 402 Capucci, L., D. Chasey, A. Lavazza and D. Westcott, 1996a: Preliminary characterization of a non-  
403 haemagglutinating strain of rabbit haemorrhagic disease virus from the United Kingdom.  
404 *Zentralbl Veterinarmed B*, 43, 245-250.
- 405 Capucci, L., F. Fallacara, S. Grazioli, A. Lavazza, M. L. Pacciarini and E. Brocchi, 1998: A further step in  
406 the evolution of rabbit hemorrhagic disease virus: the appearance of the first consistent  
407 antigenic variant. *Virus Res*, 58, 115-126.
- 408 Capucci, L., G. Frigoli, L. Ronshold, A. Lavazza, E. Brocchi and C. Rossi, 1995: Antigenicity of the rabbit  
409 hemorrhagic disease virus studied by its reactivity with monoclonal antibodies. *Virus Res*, 37,  
410 221-238.
- 411 Capucci, L., P. Fusi, A. Lavazza, M. L. Pacciarini and C. Rossi, 1996b: Detection and preliminary  
412 characterization of a new rabbit calicivirus related to rabbit hemorrhagic disease virus but  
413 nonpathogenic. *J Virol*, 70, 8614-8623.
- 414 Capucci, L., M. T. Scicluna and A. Lavazza, 1991: Diagnosis of viral haemorrhagic disease of rabbits  
415 and the European brown hare syndrome. *Rev Sci Tech*, 10, 347-370.
- 416 Carvalho, C. L., E. L. Duarte, M. Monteiro, A. Botelho, T. Albuquerque, M. Fevereiro, A. M. Henriques,  
417 S. S. Barros and M. D. Duarte, 2017: Challenges in the rabbit haemorrhagic disease 2  
418 (RHDV2) molecular diagnosis of vaccinated rabbits. *Vet Microbiol*, 198, 43-50.
- 419 Collins, B. J., J. R. White, C. Lenghaus, V. Boyd and H. A. Westbury, 1995: A Competition Elisa For The  
420 Detection Of Antibodies To Rabbit Hemorrhagic-Disease Virus. *Vet Microbiol*, 43, 85-96.
- 421 Cooke, B., Chudleigh, P., Simpson S., Saunders, G., 2013: The economic Benefits of the biological  
422 control of rabbits in Australia, 150 - 2011. *Australian Economic History Review*, 53, 1-17.
- 423 Cooke, B. D., 2002: Rabbit haemorrhagic disease: field epidemiology and the management of wild  
424 rabbit populations. *Rev Sci Tech*, 21, 347-358.
- 425 Cooke, B. D., R. P. Duncan, I. McDonald, J. Liu, L. Capucci, G. J. Mutze and T. Strive, 2018: Prior  
426 exposure to non-pathogenic calicivirus RCV-A1 reduces both infection rate and mortality  
427 from rabbit haemorrhagic disease in a population of wild rabbits in Australia. *Transboundary*  
428 *and emerging diseases*, 65, e470-e477.
- 429 Cooke, B. D. and F. Fenner, 2002: Rabbit haemorrhagic disease and the biological control of wild  
430 rabbits, *Oryctolagus cuniculus*, in Australia and New Zealand. *Wildlife Research*, 29, 689-706.
- 431 Cooke, B. D., A. J. Robinson, J. C. Merchant, A. Nardin and L. Capucci, 2000: Use of ELISAs in field  
432 studies of rabbit haemorrhagic disease (RHD) in Australia. *Epidemiology and infection*, 124,  
433 563-576.
- 434 Cox, T., T. Strive, G. Mutze, P. West and G. Saunders, 2013: Benefits of Rabbit Control in Australia:  
435 Report. Invasive Animals Cooperative research Centre.

- 436 Cox, T. E., J. Liu, R. van de Ven and T. Strive, 2017: Different Serological Profiles to Co-Occurring  
437 Pathogenic and Nonpathogenic Caliciviruses in Wild European Rabbits (*Oryctolagus*  
438 *Cuniculus*) across Australia. *J Wildlife Dis*, 53, 472-481.
- 439 Dalton, K. P., I. Nicieza, J. Abrantes, P. J. Esteves and F. Parra, 2014: Spread of new variant RHDV in  
440 domestic rabbits on the Iberian Peninsula. *Vet Microbiol*, 169, 67-73.
- 441 Dalton, K. P., I. Nicieza, A. Balseiro, M. A. Muguerza, J. M. Rosell, R. Casais, A. L. Alvarez and F. Parra,  
442 2012: Variant rabbit hemorrhagic disease virus in young rabbits, Spain. *Emerg Infect Dis*, 18,  
443 2009-2012.
- 444 Dalton, K. P., A. Podadera, V. Granda, I. Nicieza, D. del Llano, R. Gonzalez, J. R. de Los Toyos, M. G.  
445 Ocana, F. Vazquez, J. M. M. Alonso, J. M. Prieto, F. Parra and R. Casais, 2018: ELISA for  
446 detection of variant rabbit haemorrhagic disease virus RHDV2 antigen in liver extracts. *J Virol*  
447 *Methods*, 251, 38-42.
- 448 Duarte, M. D., C. L. Carvalho, S. C. Barros, A. M. Henriques, F. Ramos, T. Fagulha, T. Luis, E. L. Duarte  
449 and M. Fevereiro, 2015: A real time Taqman RT-PCR for the detection of rabbit hemorrhagic  
450 disease virus 2 (RHDV2). *J Virol Methods*, 219, 90-95.
- 451 Elsworth, P. G., J. Kovaliski and B. D. Cooke, 2012: Rabbit haemorrhagic disease: are Australian  
452 rabbits (*Oryctolagus cuniculus*) evolving resistance to infection with Czech CAPM 351 RHDV?  
453 *Epidemiology and infection*, 140, 1972-1981.
- 454 Hall, R. N., J. E. Mahar, S. Haboury, V. Stevens, E. C. Holmes and T. Strive, 2015: Emerging Rabbit  
455 Hemorrhagic Disease Virus 2 (RHDVb), Australia. *Emerg Infect Dis*, 21, 2276-2278.
- 456 Hall, R. N., J. E. Mahar, A. J. Read, R. Mourant, M. Piper, N. Huang and T. Strive, 2018: A strain-  
457 specific multiplex RT-PCR for Australian rabbit haemorrhagic disease viruses uncovers a new  
458 recombinant virus variant in rabbits and hares. *Transboundary and emerging diseases*, 65,  
459 e444-e456.
- 460 Hall, R. N., D. E. Peacock, J. Kovaliski, J. E. Mahar, R. Mourant, M. Piper and T. Strive, 2017: Detection  
461 of RHDV2 in European brown hares (*Lepus europaeus*) in Australia. *Vet Rec*, 180.
- 462 Kong, D. S., J. S. Liu, Q. Jiang, Z. Yu, X. L. Hu, D. C. Guo, Q. Q. Huang, M. H. Jiao and L. D. Qu, 2016:  
463 Production, Characterization, and Epitope Mapping of Monoclonal Antibodies Against  
464 Different Subtypes of Rabbit Hemorrhagic Disease Virus (RHDV). *Sci Rep-Uk*, 6.
- 465 Lavazza, A. and L. Capucci, 2016: Rabbit haemorrhagic disease. In: OIE manual of diagnostic tests and  
466 vaccines for terrestrial animals. 2016 [cited 2017 Jan 13].  
467 [http://www.oie.int/fileadmin/Home/eng/Health\\_standards/tahm/2.06.02\\_RHD.pdf](http://www.oie.int/fileadmin/Home/eng/Health_standards/tahm/2.06.02_RHD.pdf).
- 468 Le Gall-Recule, G., E. Lemaitre, S. Bertagnoli, C. Hubert, S. Top, A. Decors, S. Marchandeanu and J. S.  
469 Guitton, 2017: Large-scale lagovirus disease outbreaks in European brown hares (*Lepus*  
470 *europaeus*) in France caused by RHDV2 strains spatially shared with rabbits (*Oryctolagus*  
471 *cuniculus*). *Veterinary research*, 48.
- 472 Le Gall-Recule, G., F. Zwingelstein, S. Boucher, B. Le Normand, G. Plassiart, Y. Portejoie, A. Decors, S.  
473 Bertagnoli, J. L. Guerin and S. Marchandeanu, 2011: Detection of a new variant of rabbit  
474 haemorrhagic disease virus in France. *Vet Rec*, 168, 137-138.
- 475 Le Pendu, J., J. Abrantes, S. Bertagnoli, J. S. Guitton, G. Le Gall-Recule, A. M. Lopes, S. Marchandeanu,  
476 F. Alda, T. Almeida, A. P. Celio, J. Barcena, G. Burmakina, E. Blanco, C. Calvete, P. Cavadini, B.  
477 Cooke, K. Dalton, M. D. Mateos, W. Deptula, J. S. Eden, F. Wang, C. C. Ferreira, P. Ferreira, P.  
478 Foronda, D. Goncalves, D. Gavier-Widen, R. Hall, B. Hukowska-Szematowicz, P. Kerr, J.  
479 Kovaliski, A. Lavazza, J. Mahar, A. Malogolovkin, R. M. Marques, S. Marques, A. Martin-  
480 Alonso, P. Monterroso, S. Moreno, G. Mutze, A. Neimanis, P. Niedzwiedzka-Rystweij, D.  
481 Peacock, F. Parra, M. Rocchi, C. Rouco, N. Ruvoen-Clouet, E. Silva, D. Silverio, T. Strive, G.  
482 Thompson, B. Tokarz-Deptula and P. Esteves, 2017: Proposal for a unified classification  
483 system and nomenclature of lagoviruses. *Journal of General Virology*, 98, 1658-1666.
- 484 Liu, J., D. A. Fordham, B. D. Cooke, T. Cox, G. Mutze and T. Strive, 2014: Distribution and Prevalence  
485 of the Australian Non-Pathogenic Rabbit Calicivirus Is Correlated with Rainfall and  
486 Temperature. *Plos One*, 9.

- 487 Liu, J., P. J. Kerr and T. Strive, 2012a: A sensitive and specific blocking ELISA for the detection of  
488 rabbit calicivirus RCV-A1 antibodies. *Virology*, 9, (3 September 2012)-(2013 September 2012).
- 489 Liu, J., P. J. Kerr, J. D. Wright and T. Strive, 2012b: Serological assays to discriminate rabbit  
490 haemorrhagic disease virus from Australian non-pathogenic rabbit calicivirus. *Vet Microbiol*,  
491 157, 345-354.
- 492 Mahar, J. E., R. N. Hall, D. Peacock, J. Kovaliski, M. Piper, R. Mourant, N. N. Huang, S. Campbell, X. N.  
493 Gu, A. Read, N. Urakova, T. Cox, E. C. Holmes and T. Strive, 2018a: Rabbit Hemorrhagic  
494 Disease Virus 2 (RHDV2; GI.2) Is Replacing Endemic Strains of RHDV in the Australian  
495 Landscape within 18 Months of Its Arrival. *J Virol*, 92.
- 496 Mahar, J. E., A. J. Read, X. N. Gu, N. Urakova, R. Mourant, M. Piper, S. Haboury, E. C. Holmes, T. Strive  
497 and R. N. Hall, 2018b: Detection and Circulation of a Novel Rabbit Hemorrhagic Disease Virus  
498 in Australia. *Emerg Infect Dis*, 24, 22-31.
- 499 Matthaei, M., P. J. Kerr, A. J. Read, P. Hick, S. Haboury, J. D. Wright and T. Strive, 2014: Comparative  
500 quantitative monitoring of rabbit haemorrhagic disease viruses in rabbit kittens. *Virology*, 11.
- 501 Mutze, G., P. Bird, S. Jennings, D. Peacock, N. de Preu, J. Kovaliski, B. Cooke and L. Capucci, 2014:  
502 Recovery of South Australian rabbit populations from the impact of rabbit haemorrhagic  
503 disease. *Wildlife Research*, 41, 552-559.
- 504 Mutze, G., B. Cooke and P. Alexander, 1998: The initial impact of rabbit hemorrhagic disease on  
505 European rabbit populations in South Australia. *J Wildl Dis*, 34, 221-227.
- 506 Nagesha, H. S., K. A. McColl, B. J. Collins, C. J. Morrissy, L. F. Wang and H. A. Westbury, 2000: The  
507 presence of cross-reactive antibodies to rabbit haemorrhagic disease virus in Australian wild  
508 rabbits prior to the escape of virus from quarantine. *Arch Virol*, 145, 749-757.
- 509 Neave, M. J., R. N. Hall, N. Huang, K. A. McColl, P. Kerr, M. Hoehn, J. Taylor and T. Strive, 2018:  
510 Robust Innate Immunity of Young Rabbits Mediates Resistance to Rabbit Hemorrhagic  
511 Disease Caused by Lagovirus Europaeus GI.1 But Not GI.2. *Viruses*, 10.
- 512 Neimanis, A., U. L. Pettersson, N. Huang, D. Gavier-Widen and T. Strive, 2018a: Elucidation of the  
513 pathology and tissue distribution of Lagovirus europaeus GI.2/RHDV2 (rabbit haemorrhagic  
514 disease virus 2) in young and adult rabbits (*Oryctolagus cuniculus*). *Veterinary research*, 49.
- 515 Neimanis, A. S., H. Ahola, U. L. Pettersson, A. M. Lopes, J. Abrantes, S. Zohari, P. J. Esteves and D.  
516 Gavier-Widen, 2018b: Overcoming species barriers: an outbreak of Lagovirus europaeus  
517 GI.2/RHDV2 in an isolated population of mountain hares (*Lepus timidus*). *Bmc Vet Res*, 14.
- 518 Nystroem, K., G. Le Gall-Recule, P. Grassi, J. Abrantes, N. Ruvoen-Clouet, B. Le Moullac-Vaidye, A. M.  
519 Lopes, P. J. Esteves, T. Strive, S. Marchandea, A. Dell, S. M. Haslam and J. Le Pendu, 2011:  
520 Histo-Blood Group Antigens Act as Attachment Factors of Rabbit Hemorrhagic Disease Virus  
521 Infection in a Virus Strain-Dependent Manner. *Plos Pathog*, 7.
- 522 Oem, J. K., K. N. Lee, I. S. Roh, K. K. Lee, S. H. Kim, H. R. Kim, C. K. Park and Y. S. Joo, 2009:  
523 Identification and Characterization of Rabbit Hemorrhagic Disease Virus Genetic Variants  
524 Isolated in Korea. *Journal of Veterinary Medical Science*, 71, 1519-1523.
- 525 Pedler, R. D., R. Brandle, J. L. Read, R. Southgate, P. Bird and K. E. Moseby, 2016: Rabbit biocontrol  
526 and landscape-scale recovery of threatened desert mammals. *Conservation Biology*.
- 527 Puggioni, G., P. Cavadini, C. Maestrale, R. Scivoli, G. Botti, L. Ciriaco, G. Le Gall-Recule, A. Lavazza and  
528 L. Capucci, 2013: The new French 2010 Rabbit Hemorrhagic Disease Virus causes an RHD-like  
529 disease in the Sardinian Cape hare (*Lepus capensis mediterraneus*). *Veterinary research*, 44,  
530 1-14.
- 531 Robinson, A. J., P. D. Kirkland, R. I. Forrester, L. Capucci, B. D. Cooke and A. W. Philbey, 2002:  
532 Serological evidence for the presence of a calicivirus in Australian wild rabbits, *Oryctolagus*  
533 *cuniculus*, before the introduction of rabbit haemorrhagic disease virus (RHDV): its potential  
534 influence on the specificity of a competitive ELISA for RHDV. *Wildlife Research*, 29, 655-662.
- 535 Saunders, G., B. Kay, G. Mutze and D. Choquenot, 2002: Observations on the impacts of rabbit  
536 haemorrhagic disease on agricultural production values in Australia. *Wildlife Research*, 29,  
537 605-613.

- 538 Strive, T. and T. E. Cox, 2019: Lethal biological control of rabbits—the most powerful tools for  
539 landscape-scale mitigation of rabbit impacts in Australia. *Australian Zoologist*.
- 540 Strive, T., P. Elsworth, J. Liu, J. D. Wright, J. Kovaliski and L. Capucci, 2013: The non-pathogenic  
541 Australian rabbit calicivirus RCV-A1 provides temporal and partial cross protection to lethal  
542 Rabbit Haemorrhagic Disease Virus infection which is not dependent on antibody titres.  
543 *Veterinary research*, 44, (8 July 2013)-(2018 July 2013).
- 544 Velarde, R., P. Cavadini, A. Neimanis, O. Cabezon, M. Chiari, A. Gaffuri, S. Lavin, G. Grilli, D. Gavier-  
545 Widen, A. Lavazza and L. Capucci, 2016: Spillover Events of Infection of Brown Hares (*Lepus*  
546 *europaeus*) with Rabbit Haemorrhagic Disease Type 2 Virus (RHDV2) Caused Sporadic Cases  
547 of an European Brown Hare Syndrome-Like Disease in Italy and Spain. *Transboundary and*  
548 *emerging diseases*.
- 549 Velarde, R., P. Cavadini, A. Neimanis, O. Cabezon, M. Chiari, A. Gaffuri, S. Lavin, G. Grilli, D. Gavier-  
550 Widen, A. Lavazza and L. Capucci, 2017: Spillover Events of Infection of Brown Hares (*Lepus*  
551 *europaeus*) with Rabbit Haemorrhagic Disease Type 2 Virus (RHDV2) Caused Sporadic Cases  
552 of an European Brown Hare Syndrome-Like Disease in Italy and Spain. *Transboundary and*  
553 *emerging diseases*, 64, 1750-1761.
- 554 Wang, X., H. Hao, L. Qiu, R. Dang, E. Du, S. Zhang and Z. Yang, 2012: Phylogenetic analysis of rabbit  
555 hemorrhagic disease virus in China and the antigenic variation of new strains. *Arch Virol*,  
556 157, 1523-1530.
- 557
- 558

559 **Tables**

560 **Table 1:** Serological reaction profiles in experimentally generated polyclonal sera against four types  
 561 of RHDV and RCV-A1.

562

| rabbit ID                       | dpv | dpi | RHDV IgM | RHDV IgA | RHDV IgG | RHDV cELISA | RHDV-2 IgM | RHDV-2 IgA | RHDV-2 cELISA | RCV-A1 bELISA |
|---------------------------------|-----|-----|----------|----------|----------|-------------|------------|------------|---------------|---------------|
| <b>RHDV-2 polyclonal sera</b>   |     |     |          |          |          |             |            |            |               |               |
| A#Zor                           | 0   |     | 0        | 0        | 0        | -           | -          | -          | 0             | -             |
| A#Zor                           | 6   |     | 640      | 0        | 160      | -           | 40960      | 0          | 160           | -             |
| A#Zor                           | 10  | 0   | 640      | 0        | 160      | -           | 40960      | 0          | 320           | -             |
| A#Zor                           | 14  | 4   | 640      | 0        | 640      | -           | 40960      | 0          | 160           | -             |
| A#Zor                           | 16  | 6   | 2560     | 0        | 2560     | -           | 40960      | 10240      | 1280          | -             |
| A#Zor                           | 24  | 14  | 640      | 80       | 2560     | -           | 10240      | 10240      | 2560          | -             |
| A#Zor                           | 26  | 16  | 640      | 80       | 10240    | -           | 10240      | 10240      | 2560          | -             |
| A#Zor                           | 34  | 24  | 640      | 640      | 10240    | 320         | 2560       | 40960      | 5120          | 0             |
| A#Jul                           | 0   |     | 0        | 0        | 0        | -           | -          | -          | 0             | -             |
| A#Jul                           | 5   |     | 0        | 0        | 0        | -           | 640        | 0          | 10            | -             |
| A#Jul                           | 6   | 0   | 0        | 0        | 0        | -           | 2560       | 0          | 80            | -             |
| A#Jul                           | 14  | 8   | 0        | 20       | 2560     | -           | 10240      | 640        | 320           | -             |
| A#Jul                           | 16  | 10  | 0        | 0        | 10240    | -           | 10240      | 640        | 1280          | -             |
| A#Jul                           | 24  | 17  | 80       | 20       | 10240    | 20          | 10240      | 10240      | 1280          | 0             |
| K#316                           | 0   |     | 0        | 0        | 0        | -           | -          | -          | 0             | -             |
| K#316                           | 5   |     | 0        | 0        | 0        | -           | -          | -          | 0             | -             |
| K#316                           | 6   | 0   | 0        | 0        | 0        | -           | 640        | -          | 10            | -             |
| K#316                           | 14  | 8   | 640      | 160      | 2560     | -           | 40960      | 10240      | 1280          | -             |
| K#316                           | 16  | 10  | 640      | 160      | 10240    | -           | 40960      | 10240      | 160           | -             |
| K#316                           | 24  | 17  | 640      | 40       | 10240    | 20          | 10240      | 2560       | 2560          | 0             |
| K#317                           | 0   |     | 0        | 0        | 0        | -           | -          | -          | 0             | -             |
| K#317                           | 5   |     | 0        | 0        | 0        | -           | -          | -          | 0             | -             |
| K#317                           | 6   | 0   | 160      | 0        | 0        | -           | -          | -          | 10            | -             |
| K#317                           | 14  | 8   | 640      | 80       | 2560     | -           | 10240      | 10240      | 160           | -             |
| K#317                           | 16  | 10  | 160      | 80       | 2560     | -           | 10240      | 10240      | 160           | -             |
| K#317                           | 24  | 17  | 320      | 320      | 2560     | 20          | 10240      | 2560       | 1280          | 0             |
| K#318                           | 0   |     | 0        | 0        | 0        | -           | -          | -          | 0             | -             |
| K#318                           | 5   |     | 0        | 0        | 0        | -           | -          | -          | 10            | -             |
| K#318                           | 6   | 0   | 0        | 0        | 0        | -           | -          | -          | 20            | -             |
| K#318                           | 14  | 8   | 160      | 80       | 2560     | -           | -          | -          | 320           | -             |
| K#318                           | 16  | 10  | 160      | 80       | 10240    | -           | 10240      | 10240      | 320           | -             |
| K#318                           | 24  | 17  | 640      | 80       | 10240    | 20          | 10240      | 2560       | 1280          | 0             |
| <b>RHDVa-K5 polyclonal sera</b> |     |     |          |          |          |             |            |            |               |               |
| K#307                           |     | 0   | 0        | 0        | 0        | -           | -          | -          | 0             | -             |
| K#307                           |     | 7   | 40960    | 2560     | 2560     | -           | 10240      | 2560       | 10            | -             |

|       |    |       |       |       |     |       |      |    |   |
|-------|----|-------|-------|-------|-----|-------|------|----|---|
| K#307 | 14 | 10240 | 2560  | 2560  | -   | 2560  | 640  | 0  | - |
| K#307 | 20 | 10240 | 10240 | 40960 | 320 | 640   | 2560 | 10 | 0 |
| K#308 | 0  | 0     | 0     | 0     | -   | -     | -    | 0  | - |
| K#308 | 7  | 10240 | 1280  | 2560  | -   | 10240 | 640  | 0  | - |
| K#308 | 14 | 10240 | 1280  | 2560  | -   | 2560  | 640  | 10 | - |
| K#308 | 20 | 5120  | 2560  | 10240 | 320 | 640   | 2560 | 40 | 0 |
| K#309 | 0  | 0     | 0     | 0     | -   | -     | -    | 0  | - |
| K#309 | 7  | 40960 | 2560  | 2560  | -   | 10240 | 2560 | 10 | - |
| K#309 | 14 | 10240 | 1280  | 2560  | -   | 640   | 160  | 10 | - |
| K#309 | 20 | 5120  | 1280  | 10240 | 640 | 640   | 640  | 40 | 0 |
| K#310 | 0  | 0     | 0     | 0     | -   | -     | -    | 0  | - |
| K#310 | 7  | 40960 | 2560  | 2560  | -   | 2560  | 160  | 10 | - |
| K#310 | 14 | 10240 | 640   | 2560  | 320 | 640   | 640  | 10 | 0 |
| K#311 | 0  | 0     | 0     | 0     | -   | -     | -    | 0  | - |
| K#311 | 7  | 40960 | 2560  | 2560  | -   | 10240 | 160  | 20 | - |
| K#311 | 14 | 2560  | 5120  | 2560  | 640 | 2560  | 2560 | 10 | 0 |

---

**RHDVa-Aus polyclonal sera**

---

|       |    |       |       |       |      |       |      |     |   |
|-------|----|-------|-------|-------|------|-------|------|-----|---|
| K#312 | 0  | 0     | 0     | 0     | -    | -     | -    | 0   | - |
| K#312 | 7  | 40960 | 640   | 10240 | -    | -     | -    | 0   | - |
| K#312 | 14 | 10240 | 2560  | 10240 | 640  | 10240 | 2560 | 10  | 0 |
| K#313 | 0  | 0     | 0     | 0     | -    | -     | -    | 0   | - |
| K#313 | 7  | 40960 | 640   | 2560  | -    | 2560  | 40   | 10  | - |
| K#313 | 14 | 10240 | 1280  | 2560  | 320  | 2560  | 640  | 0   | 0 |
| K#314 | 0  | 0     | 0     | 0     | -    | -     | -    | 0   | - |
| K#314 | 7  | 10240 | 2560  | 10240 | -    | 640   | 40   | 0   | - |
| K#314 | 14 | -     | 2560  | 40960 | -    | -     | -    | 0   | - |
| K#314 | 22 | 10240 | 5120  | 40960 | 1280 | 2560  | 640  | 10  | 0 |
| K#315 | 0  | 0     | 0     | 0     | -    | -     | -    | 0   | - |
| K#315 | 7  | 40960 | 10240 | 40960 | -    | 10240 | 160  | 0   | - |
| K#315 | 14 | 10240 | 2560  | 40960 | -    | 2560  | 160  | 10  | - |
| K#315 | 22 | 10240 | 1280  | 10240 | 640  | 2560  | 640  | 160 | 0 |

---

**RHDV-Czech polyclonal sera**

---

|       |    |       |       |       |       |      |      |    |    |
|-------|----|-------|-------|-------|-------|------|------|----|----|
| K#175 | 4  | 640   | 0     | 0     | -     | -    | -    | 0  | 0  |
| K#175 | 7  | 40960 | 2560  | 40    | -     | 640  | 0    | 0  | 0  |
| K#175 | 14 | 40960 | 10240 | 40960 | 5120  | 160  | 1280 | 0  | 0  |
| K#176 | 4  | 160   | 0     | 0     | -     | -    | 0    | 0  | 0  |
| K#176 | 7  | 10240 | 1280  | 640   | -     | 640  | 160  | 0  | 0  |
| K#176 | 14 | 20480 | 10240 | 10240 | 320   | 40   | 160  | 0  | 0  |
| K#177 | 4  | 2560  | 0     | 0     | -     | -    | -    | 0  | 0  |
| K#177 | 7  | 10240 | 160   | 2560  | -     | 2560 | 160  | 0  | 0  |
| K#177 | 14 | 40960 | 5120  | 10240 | 5120  | 2560 | 640  | 10 | 10 |
| K#184 | 4  | 2560  | 0     | 160   | -     | 0    | 0    | 0  | 0  |
| K#185 | 4  | 80    | 0     | 0     | -     | 0    | 0    | 0  | 0  |
| K#135 | 0  | 0     | 0     | 0     | -     | -    | -    | 0  | -  |
| K#135 | 15 | 40960 | 10240 | 40960 | 10240 | 640  | 160  | 0  | 0  |
| K#136 | 0  | 0     | 0     | 0     | -     | -    | -    | 0  | -  |
| K#136 | 15 | 40960 | 10240 | 40960 | 10240 | 640  | 640  | 10 | 0  |

|       |    |       |       |       |       |      |     |    |   |
|-------|----|-------|-------|-------|-------|------|-----|----|---|
| K#137 | 0  | 0     | 0     | 0     | -     | -    | -   | D  | - |
| K#137 | 4  | 40960 | 5120  | 0     | -     | 2560 | -   | 10 | 0 |
| K#138 | 0  | 0     | 0     | 0     | -     | -    | -   | 0  | - |
| K#138 | 15 | 40960 | 40960 | 40960 | 20480 | 2560 | 640 | 0  | 0 |
| K#139 | 0  | 0     | 0     | 0     | -     | -    | -   | D  | - |
| K#139 | 15 | 10240 | 5120  | 40960 | 5120  | 0    | 0   | 0  | 0 |

| RCV-A1 polyclonal sera |    |       |      |       |     |   |   |   |       |
|------------------------|----|-------|------|-------|-----|---|---|---|-------|
| RCV-3                  | 7  | 0†    | 0†   | 0†    | 0†  | - | - | 0 | 160†† |
| RCV-4                  | 7  | 2560† | 320† | 320†  | 80† | - | - | 0 | 320†† |
| RCV-8                  | 11 | 0†    | 0†   | 40†   | 0†  | - | - | 0 | 40††  |
| RCV-11                 | 28 | 0†    | 160† | 2560† | 0†  | - | - | 0 | 160†† |
| RCV-12                 | 28 | 0†    | 0†   | 640†  | 0†  | - | - | 0 | 160†† |
| RCV-24                 | 9  | 0†    | 0†   | 0†    | 0†  | - | - | 0 | 320†† |
| RCV-25                 | 9  | 160†  | 0†   | 320†  | 0†  | - | - | 0 | 160†† |

dpv = Days post vaccination  
 dpi = Days post infection  
 † Data from Liu et al., 2012a  
 †† Data from Liu et al., 2012b  
 D= doubtful

563

564

565

566

567

## 568 Figures

### 569 **Figure 1: Calicivirus disease activity and proposed arrival of RHDV2 inferred from serological data**

570 **at a long term monitoring site in NSW (Oakey Creek).** A. Sera from between 10 and 25 (avg 19.3)

571 healthy shot rabbits were analysed for RHDV IgM and IgA antibodies four times per year. Presence of

572 IgM antibodies and/or an increase in IgA prevalence is used to infer recent virus activity (Cooke et

573 al., 2000). Rabbits were scored positive to RHDV2 when the ratio of the RHDV2-cELISA/RHDV-cELISA

574 titres was >1 and positive to RHDV when the ratio was <1. Prior to January 2015, RHDV prevalence

575 was inferred as the proportion of rabbits positive to the RHDVcELISA. Black arrows indicate inferred

576 virus outbreaks or prolonged periods of virus activity. The vertical dashed grey line indicates the

577 time RHDV2 was first reported in Australia (Hall et al., 2015). The vertical red box indicates the

578 approximate proposed arrival period of RHDV2 at this site. B. Individual rabbits classified as positive  
579 to RHDV or RHDV2 according to their age. Age in days was determined using the dry eye lens weight  
580 according to previously described methods (Augusteyn, 2007).

581

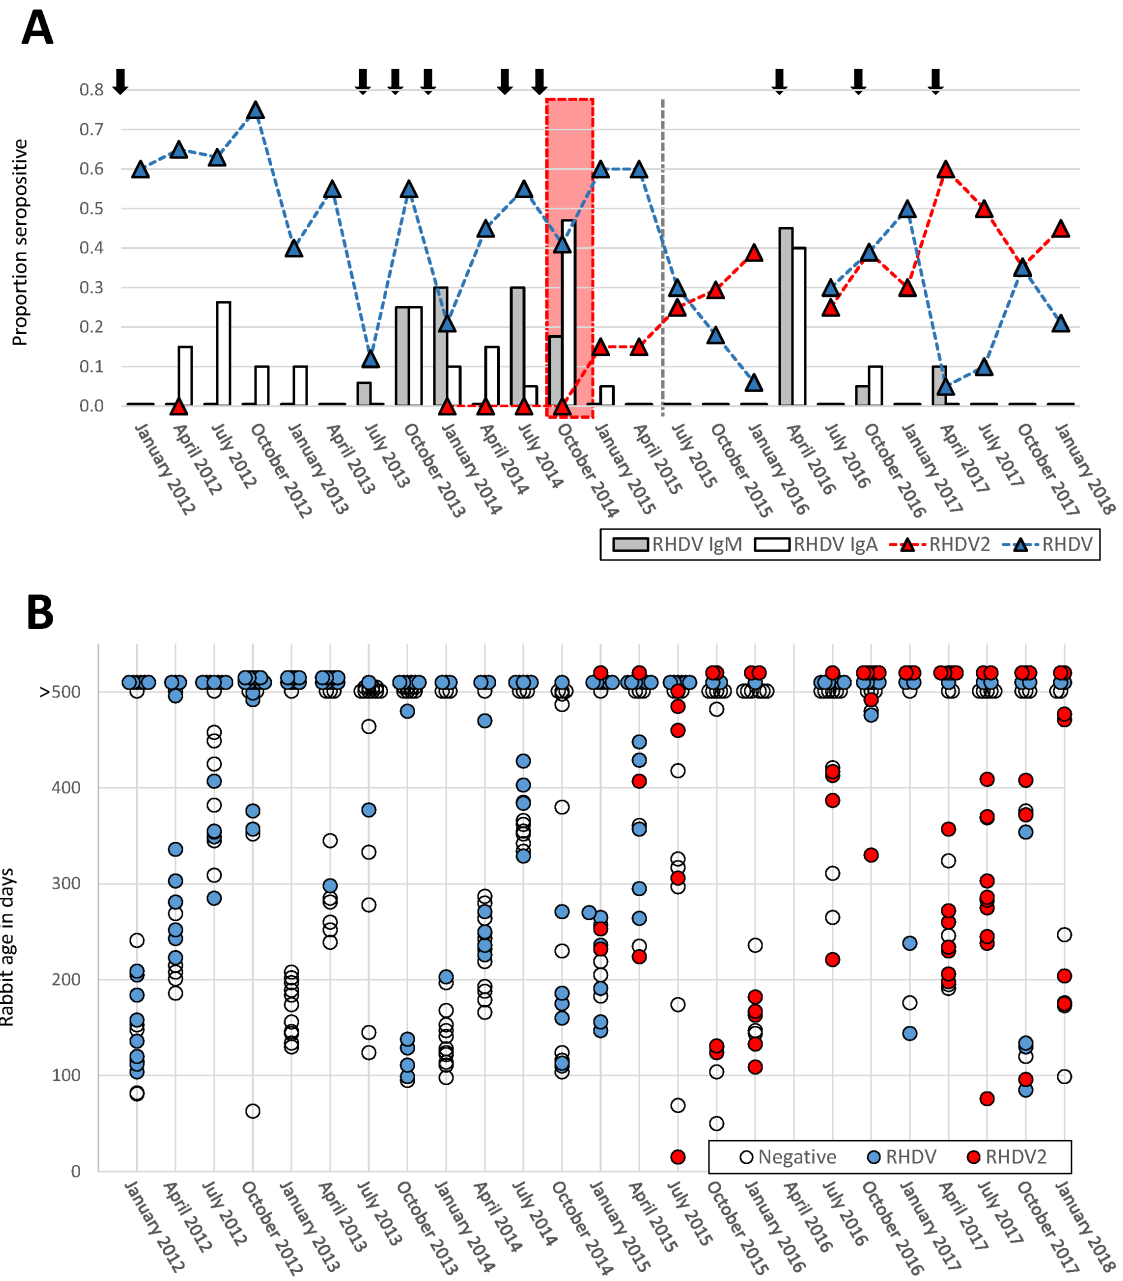

582
